# Supplementary material
Source: PubMed Central journal article supplement (PMC1415317)

**A**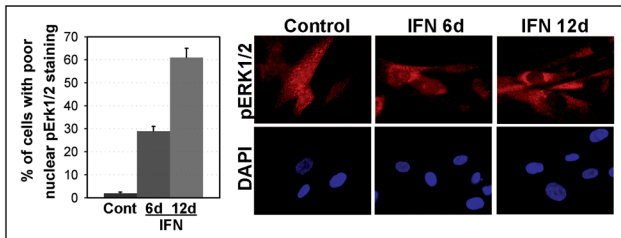**B**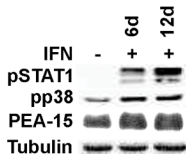**C**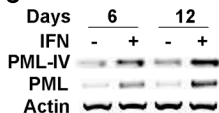**D**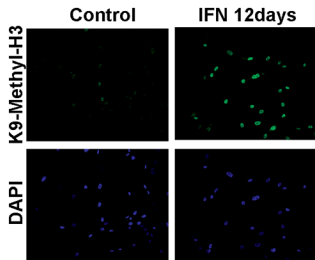

Supplement: mbc_E05-09-0858_1.pdf [file mbc_E05-09-0858_1.pdf]

**A****Control**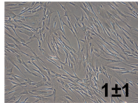**α-IFN**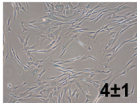**β-IFN**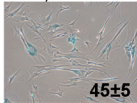**B**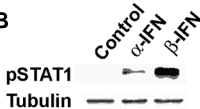

Supplement: mbc_E05-09-0858_2.pdf [file mbc_E05-09-0858_2.pdf]

**A**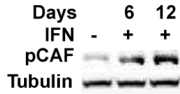**B**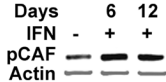**C**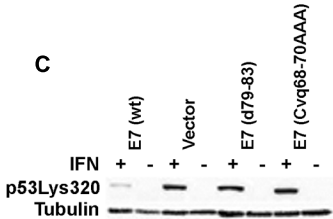

Supplement: mbc_E05-09-0858_3.pdf [file mbc_E05-09-0858_3.pdf]

**E6**

**Vector**

**Control**

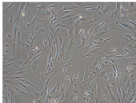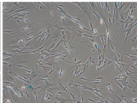

**IFN (12d)**

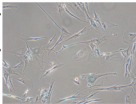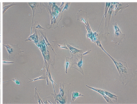

Supplement: mbc_E05-09-0858_4.pdf [file mbc_E05-09-0858_4.pdf]
